# Supplementary material for: Evaluation of translocator protein quantification as a tool for characterising macrophage burden in human carotid atherosclerosis
Source: PubMed Central journal article supplement — Atherosclerosis. 2010 Jun;210(2):388–91. doi: 10.1016/j.atherosclerosis.2009.11.047 (PMC2884178; doi:10.1016/j.atherosclerosis.2009.11.047), 2010-06

1

A

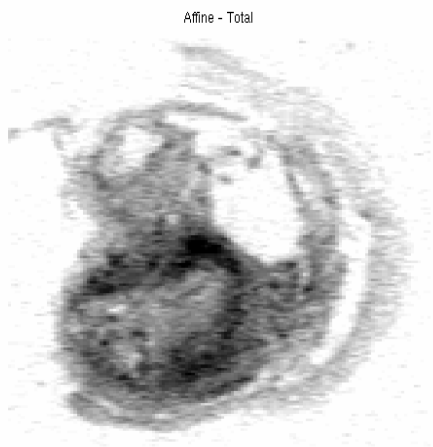

B

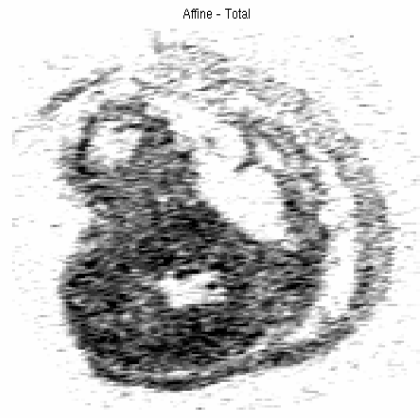

C

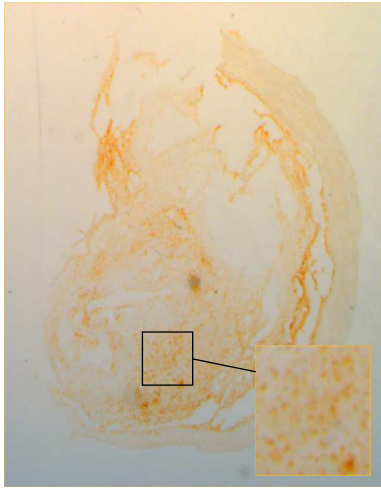

D

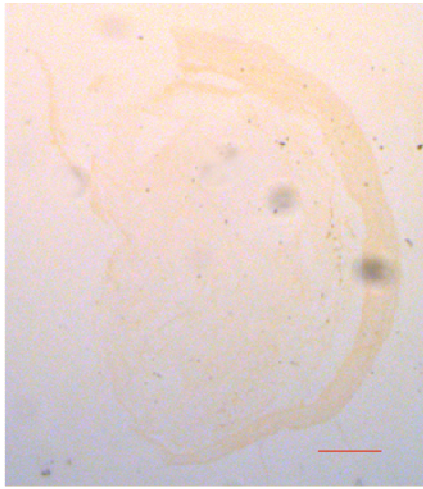

E

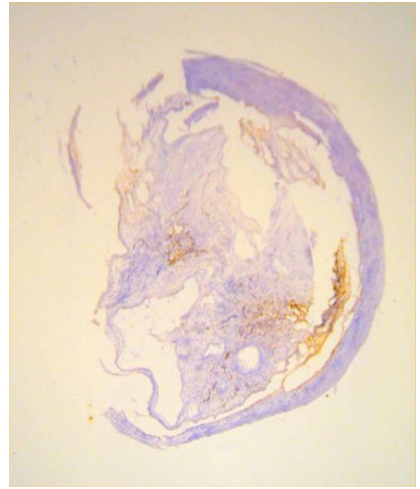

F

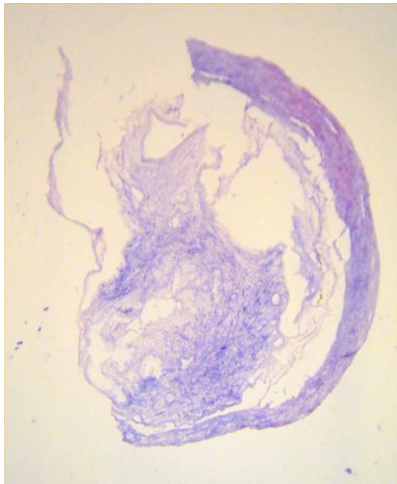

G

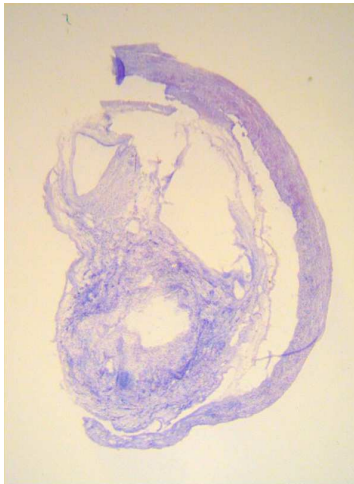

H

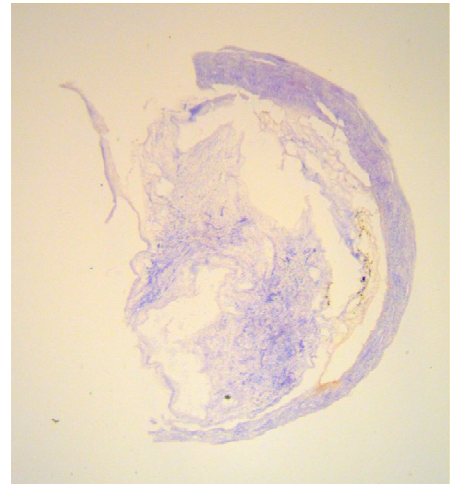

2

A

Affine - Total

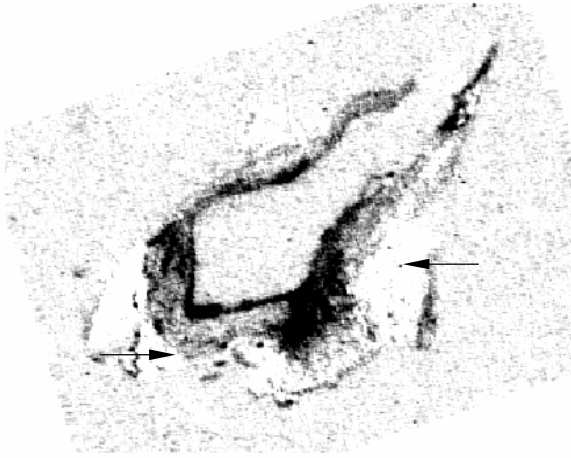

B

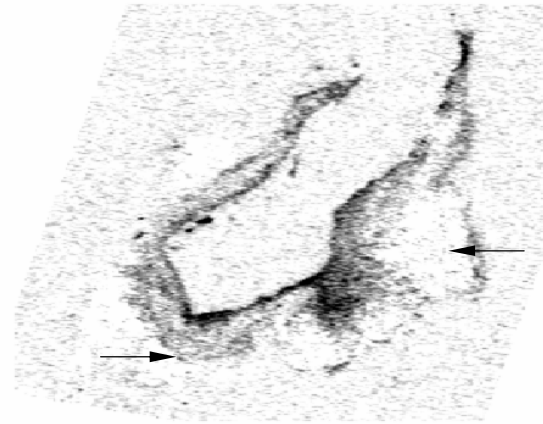

Affine - Total

C

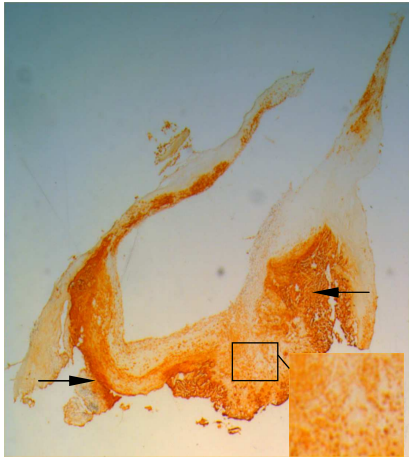

D

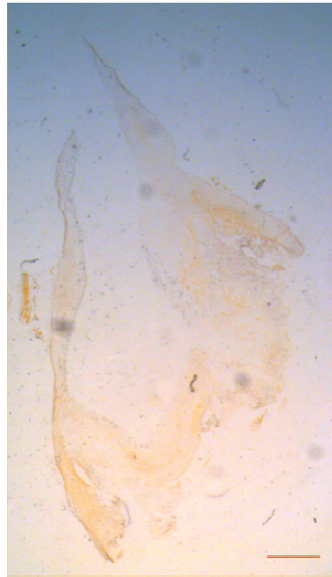

E

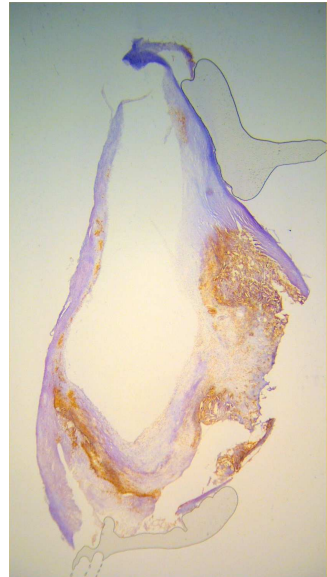

F

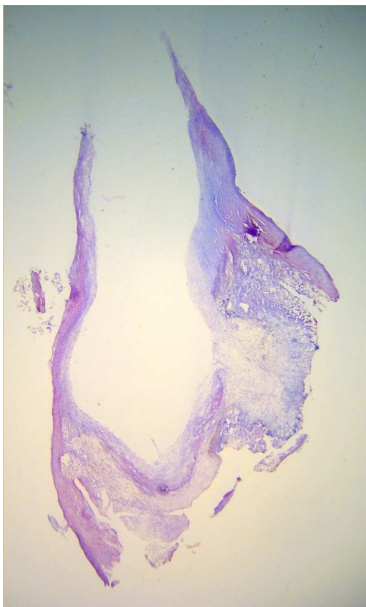

G

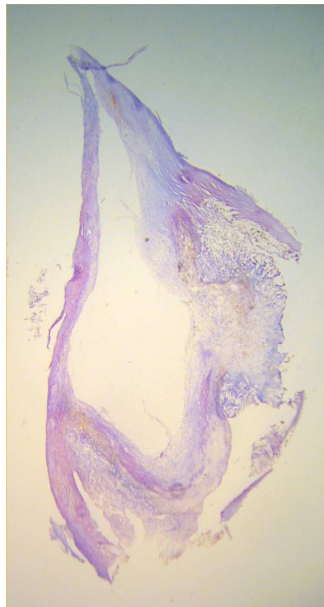

H

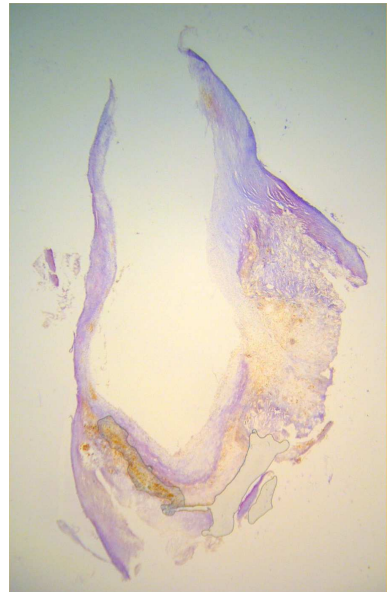



3

A

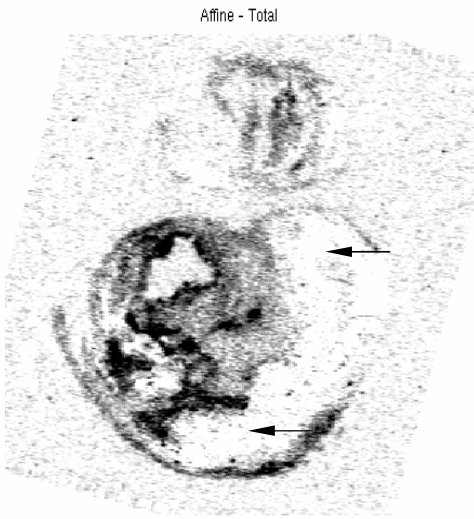

B

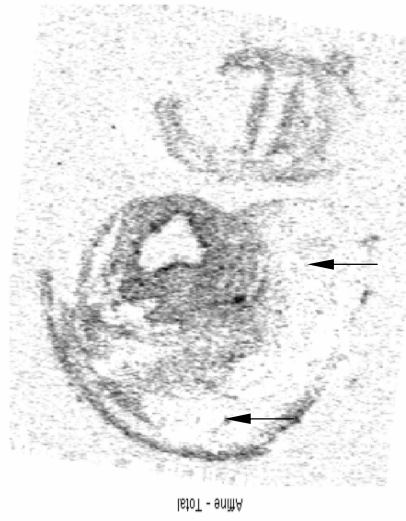

C

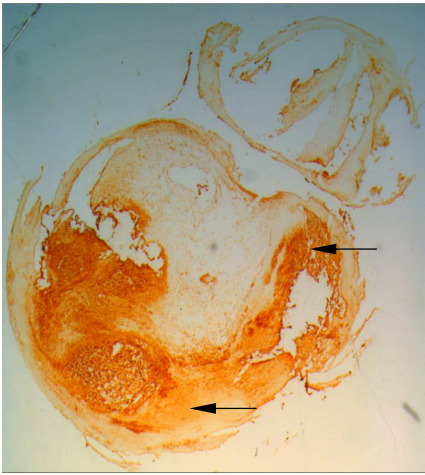

D

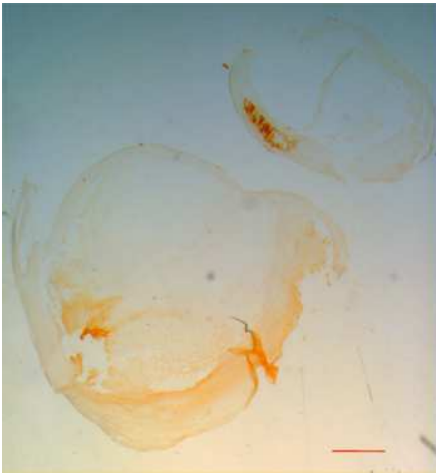

E

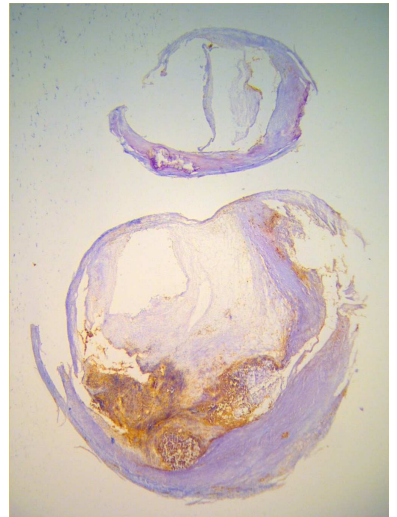

F

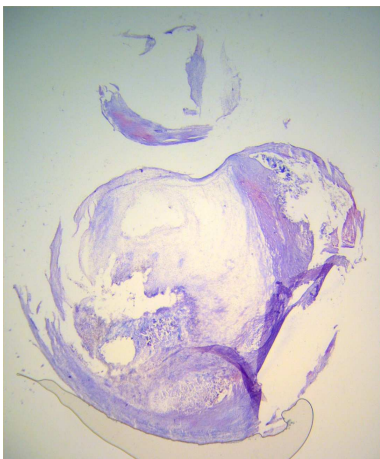

G

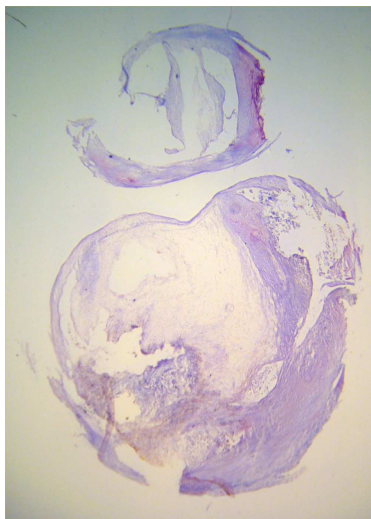

H

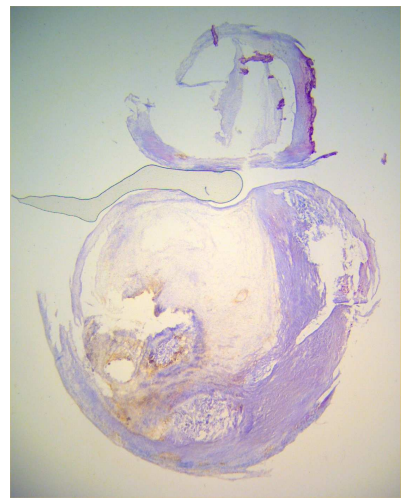

4

A

Affine - Total

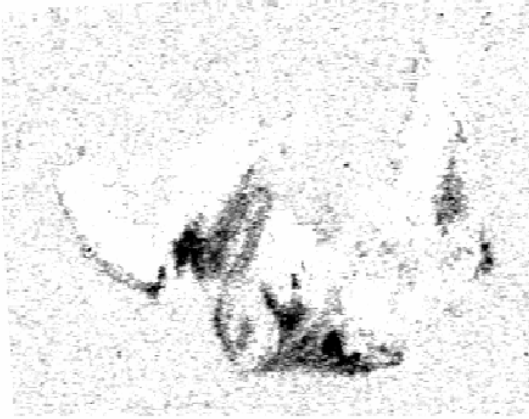

B

Affine - Total

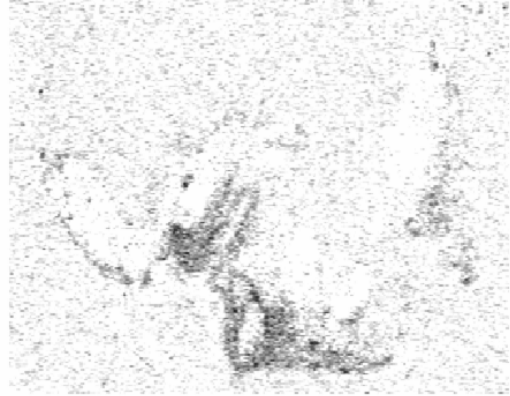

C

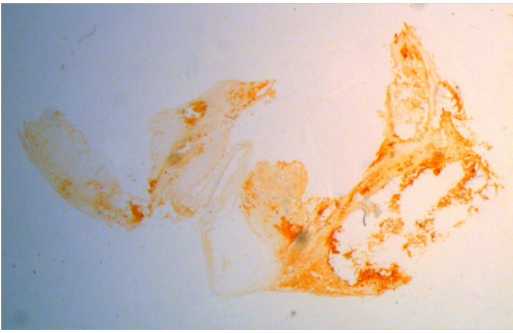

D

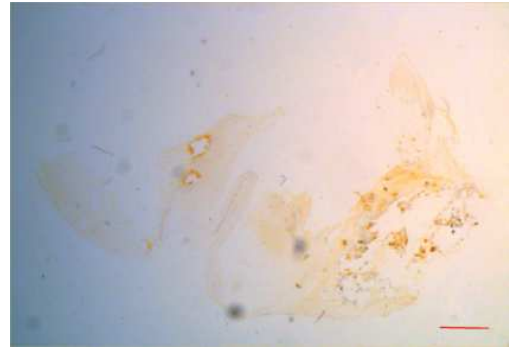

E

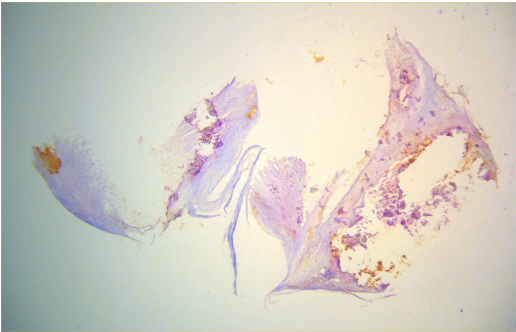

F

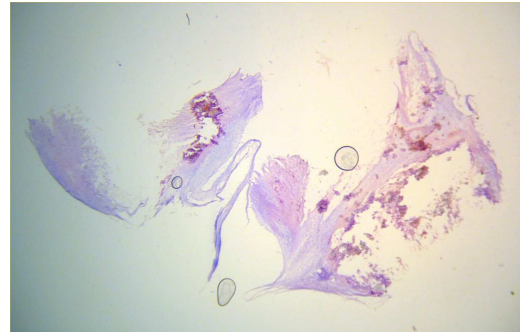

G

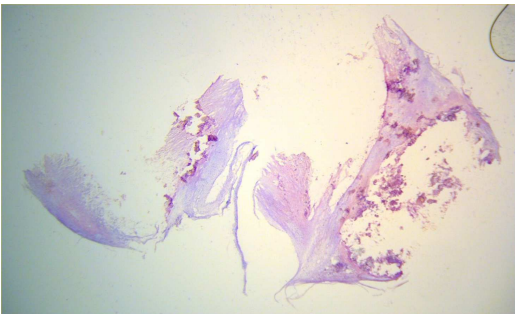

H

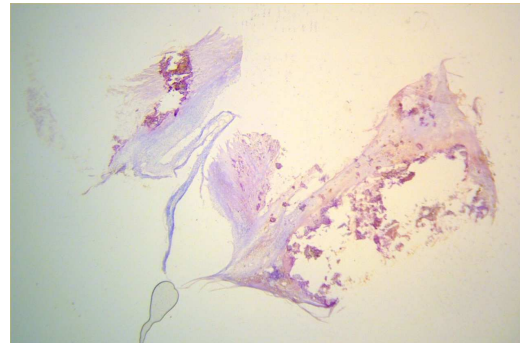



5

A

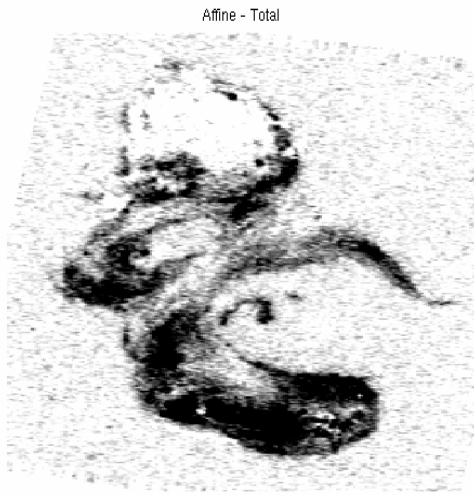

B

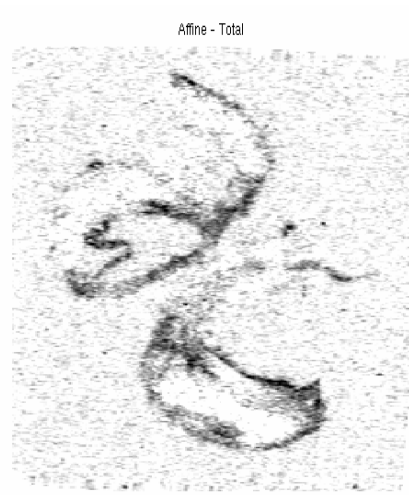

C

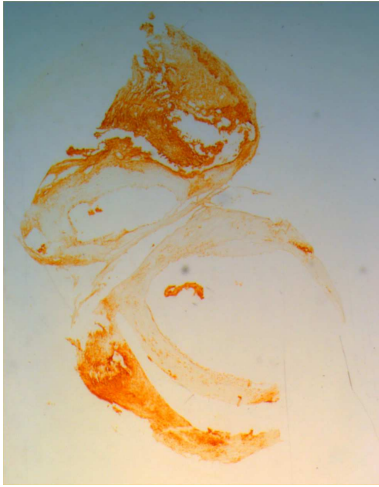

D

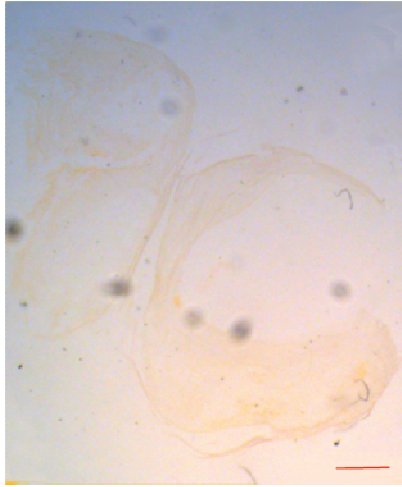

E

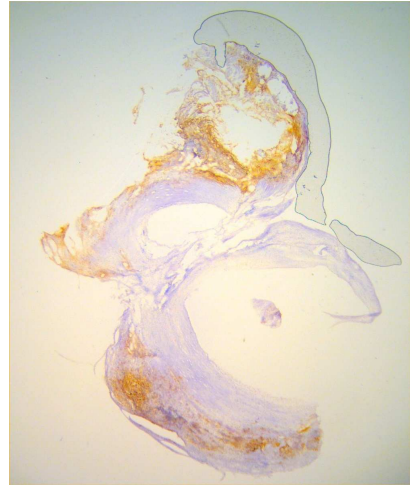

F

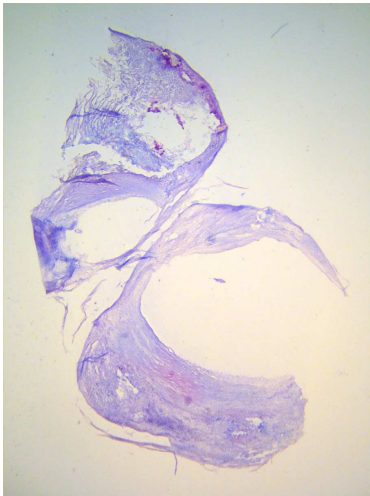

G

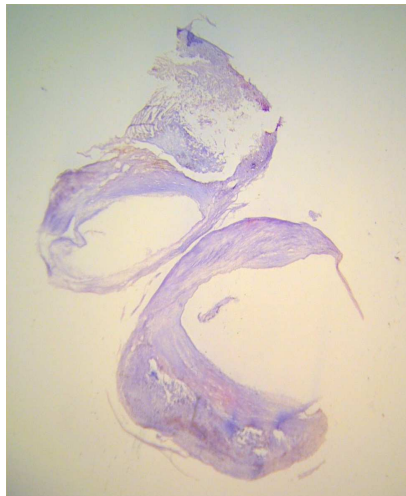

H

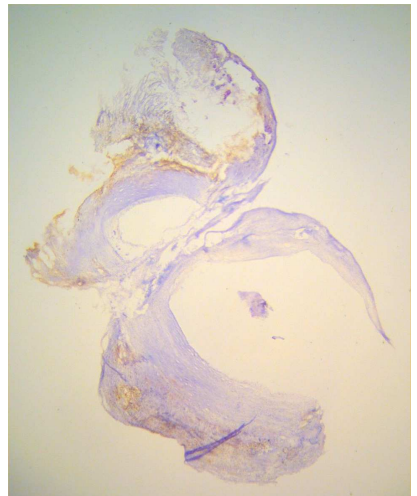

6

A

B

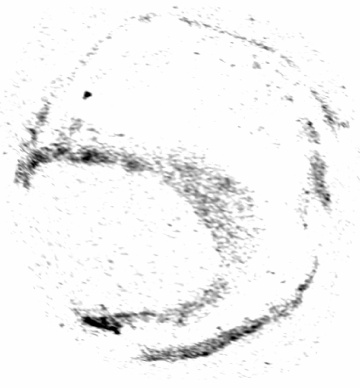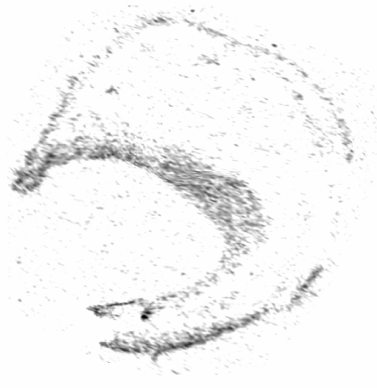

C

D

E

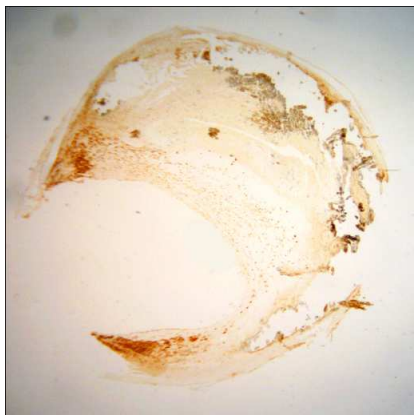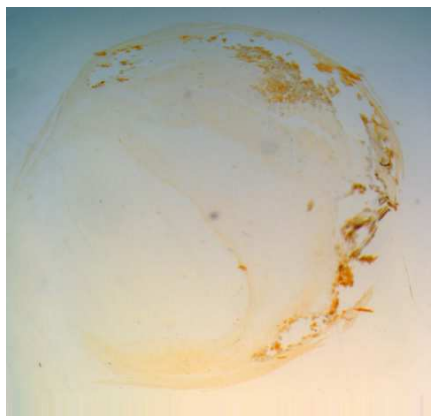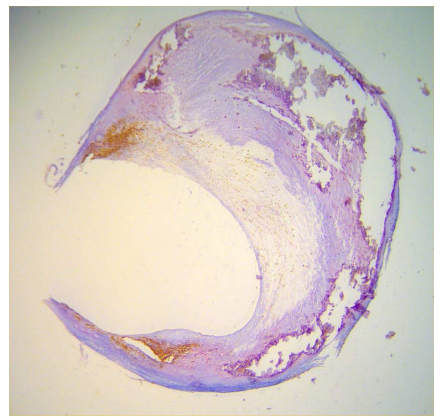

F

G

H

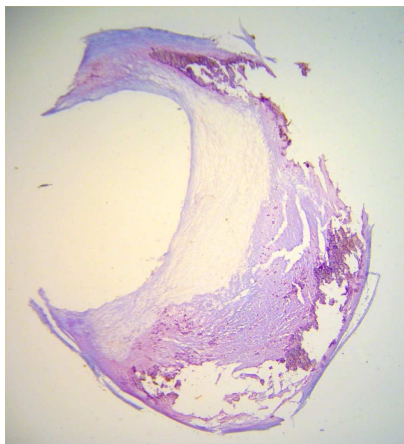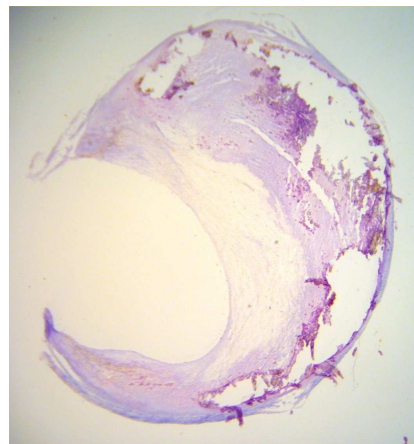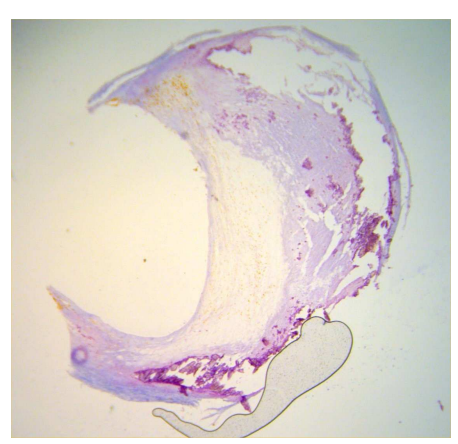

Supplement: mmc2.pdf [file mmc2.pdf]
